# Supplementary material for: On the Ontological Quality and Logical Quality of Conceptual-Modeling Grammars: The Need for a Dual Perspective
Source: Atypon-hosted journal article supplement (doi:10.1287/isre.2016.0631), 2016-05-20
Supplement: isre.2016.0631-sm.pdf [file isre.2016.0631-sm.pdf]

## Appendix I: Ontological Criteria for Evaluating the Semantics of Conceptual Modeling Grammars

To evaluate the ontological clarity and completeness of a conceptual modeling (CM) grammar, the grammar's constructs are mapped against the constructs in a benchmark ontology. Wand and Weber (1993, pp. 228–233) argue three conditions undermine *ontological clarity*:

- *Construct overload*: A single grammatical construct maps to two or more ontological constructs.
- *Construct excess*: A grammatical construct does not map to any ontological construct.
- *Construct redundancy*: Two or more grammatical constructs map to a single ontological construct.

Wand and Weber (1993, pp. 226–228) argue that *ontological completeness* is undermined when *construct deficit* exists—an ontological construct is not represented by any grammatical construct.

Our notion of ontological clarity differs in two ways from Wand and Weber's notion of ontological clarity. First, we do not see construct redundancy as undermining ontological clarity. Even though two or more grammatical constructs map to a single ontological construct, the meaning of each redundant construct is still clear. Whether the redundant constructs cause confusion among users of the grammar is an issue of pragmatics and not semantics.

Second, our concept of an always ontologically clear grammar is new. The traditional view of ontological clarity focuses on creating a mapping between individual constructs in a grammar and individual constructs in an ontological benchmark. An always-clear grammar goes further to consider the grammar's production rules. In an always-clear grammar, not only is each construct clear, but also the grammar's production rules will not allow unclear combinations of constructs in the grammar to be generated. We are not aware of any research on this property of grammars to date, but it could be viewed as an extension of the line of work begun by Evermann and Wand (2005, p. 148).

Note that ontological completeness applies only to grammars and not scripts. The reason is that we cannot know if a script includes all the grammatical constructs needed to represent all relevant ontological constructs in a domain without knowing which ontological constructs are relevant in the domain description. The latter is a pragmatic issue that lies outside the scope of ontological analysis.

Note, also, that the four ontological criteria for evaluating CM grammars are all independent of each other. The reason is that each criterion is based upon a different outcome of the mapping between the set of constructs in a CM grammar and the set of constructs in a benchmark ontology.

## Appendix II: Formal Results

In this Supplementary Appendix, we provide a rigorous proof that the grammar ERM-R is always-precise. In the main paper, we used the lay term “precise” for what logicians mean by “complete” to avoid confusion with the latter term’s more usual meaning in the conceptual modeling literature. However, we expect readers of this Appendix to be more familiar with the logician’s terminology—and we refer here to work by logicians—so we adjust our vocabulary accordingly: wherever we refer to “completeness” in this Appendix, we mean (a) what logicians mean by “completeness” and (b) what we mean by “preciseness” in the main paper.

### Syntax

ERM-R is a visual, two-dimensional language. Nonetheless, we can translate scripts in ERM-R to a linear language (like English or FOL), which greatly simplifies the proofs to follow. We proceed by producing a linear “model-description” listing the elements of a visual ER diagram and their interconnections. This process loses none of the information contained in the ER diagram. Thus, we can use model-descriptions as substitutes for ERM-R scripts. Our scripts are always finite, so we can replace them with sentences giving instructions for constructing the grammar: “There are boxes labeled ‘ $C_1$ ’ and ‘ $C_2$ ’; there is a line labeled ‘ $R_1$ ’ from the box labeled ‘ $C_1$ ’ to the box labeled ‘ $C_2$ ’; . . . .” By giving a syntax for the “language” of such translations—by giving rules determining what is and what is not an acceptable description of an ERM-R script—we effectively give a syntax for the original, untranslated language.

Table 1 gives a synopsis of our modified grammar ERM-R. The first column contains a list of visual constructs of ERM-R. The second column contains the translation of each construct into our language of model-descriptions. The third and fourth columns contain the informal and formal semantics intended for each construct.

We give a syntax for ERM-R by giving a syntax for model-descriptions in Backus-Naur form (BNF).

$$\begin{aligned}
 \langle \text{description} \rangle & ::= \langle \text{description} \rangle ; \langle \text{description} \rangle \mid \\
 & \langle \text{class} \rangle \rightarrow_{\exists} \langle \text{relation} \rangle \langle \text{class} \rangle \mid \\
 & \langle \text{class} \rangle \rightarrow_{\forall} \langle \text{relation} \rangle \langle \text{class} \rangle \mid \\
 & \langle \text{class} \rangle \subseteq \langle \text{class} \rangle \mid \langle \text{class} \rangle \langle \text{property} \rangle \\
 & \langle \text{class} \rangle \langle \text{relation} \rangle
 \end{aligned}$$

**Table 1 Vocabulary elements of ERM-R.**

| Visual construct | Linear description                  | Informal semantics                                                                | Formal semantics                                                                                              |
|------------------|-------------------------------------|-----------------------------------------------------------------------------------|---------------------------------------------------------------------------------------------------------------|
|                  | $C_i \rightarrow_{\exists} R_k C_j$ | All members of $C_i$ bear $R_k$ to at least one member of $C_j$ , and vice versa. | If $x \in C_i$ then $\exists y \in C_j$ with $R_k xy$ ; if $y \in C_j$ then $\exists x \in C_i$ with $R_k xy$ |
|                  | $C_i \rightarrow_{\forall} R_k C_j$ | All members of $C_i$ bear $R_k$ to all members of $C_j$ .                         | If $x \in C_i$ and $y \in C_j$ then $R_k xy$                                                                  |
|                  | $C_i R_k$                           | Everything in $C_i$ bears $R_k$ to itself.                                        | If $x \in C_i$ then $R_k xx$                                                                                  |
|                  | $C_i \subseteq C_j$                 | $C_i$ is a subset of $C_j$ .                                                      | $C_i \subseteq C_j$ (If $x \in C_i$ then $x \in C_j$ )                                                        |
|                  | $C_i P_j$                           | Everything in $C_i$ has $P_j$ .                                                   | If $x \in C_i$ then $P_j x$                                                                                   |

$$\langle \text{class} \rangle ::= C_1 | C_2 | \dots | C_n$$

$$\langle \text{relation} \rangle ::= R_1 | R_2 | \dots | R_m$$

$$\langle \text{property} \rangle ::= P_1 | P_2 | \dots | P_l$$

We design the syntax here for compactness rather than readability. Some brief comments on the syntax are in order. Semicolons conjoin component sentences of a description. When two classes are connected by a relation, we need to know what the relation is, its direction, and whether it is a  $\forall$ -type or  $\exists$ -type arrow. (“ $\rightarrow_{\exists}$ ” or “ $\rightarrow_{\forall}$ ”). Our description syntax does not allow sentences of the form, “There is a box labeled ‘ $C_1$ .’” This is because we assume that all classes will have some attributes—either a connection to another class via subclasshood or a relation arrow, or some intrinsic attribute of its members. Therefore, all classes will appear in one of those sentences in a model’s description, making sentences of the form, “There is a box labeled ‘ $C_1$ ,’” superfluous. From a syntactic perspective, there are no further constraints on the scripts (diagrams) we can produce: any combination of attributes, relations, and subclass relations is acceptable.

We can now define some syntactic terms that will be useful in giving a semantics below. We say that a class  $C_i$  is a *subclass* of a class  $C_j$ , and  $C_j$  is a *superclass* of  $C_i$ , and write  $C_i \subseteq C_j$ , iff the model-description contains, for some (finite) sequence of classes  $C_1, \dots, C_n$ , the sentences “ $C_i \subseteq C_1$ ,” “ $C_1 \subseteq C_2$ ,”  $\dots$ , and “ $C_n \subseteq C_j$ .” By convention, we consider each class to be a subclass (and a superclass) of itself. We say that  $C_i$  is a *proper subclass* of  $C_j$ , and write  $C_i \subset C_j$ , iff  $C_i$  is a subclass of  $C_j$  and  $C_j$  is not a subclass of  $C_i$ . If  $C_i$  is a subclass of  $C_j$  but not a proper subclass, then we write  $C_i = C_j$ . Say a class is *basic* iff it has no (non-empty) proper subclasses and *non-basic* otherwise. Note that it is possible to have basic classes  $C_i$  and

$C_j$  with  $i \neq j$  but with  $C_i = C_j$ . Finally, say a class  $C_j$  is an *immediate subclass* of a class  $C_i$  iff  $C_j \subset C_i$  and there is no class  $C_k$  such that  $C_j \subset C_k \subset C_i$ .

To deal conveniently with symmetric relations, we also add some technically superfluous sentences to our model-descriptions. If  $R_k$  is symmetric, and the model-description contains a sentence “ $C_i \rightarrow_{\exists} R_k C_j$ ,” then we add the sentence “ $C_j \rightarrow_{\exists} R_k C_i$ .” Likewise, if the model-description contains a sentence “ $C_i \rightarrow_{\forall} R_k C_j$ ,” then we add the sentence “ $C_j \rightarrow_{\forall} R_k C_i$ .” These additions have no material impact on the semantics of the original conceptual model, but they simplify the statement of the semantics in the next section.

## Semantics

We give a semantics for ERM-R by giving a translation of any given model in ERM-R to a finitely axiomatized theory of FO<sup>2</sup>. Because, as a fragment of FOL, FO<sup>2</sup> has a well-defined semantics (see, e.g., Shoenfield 1967), this translation amounts to a semantics for ERM-R.

Given a conceptual modeling script  $M$  in ERM-R, we build its translation into FOL,  $T_M$ , that we sometimes call “the (first-order) theory of  $M$ ,” as follows. The language  $\mathcal{L}$  of the theory has as its nonlogical symbols finitely many unary predicates  $C_1, C_2, \dots$ , and  $P_1, P_2, \dots$ , and finitely many binary predicates  $R_1, R_2, \dots$ ; these are, respectively, exactly those class labels, attribute labels, and relation labels that occur in  $M$ . In general,  $C_i x$  is to be interpreted as saying that  $x$  is a member of class  $C_i$ ;  $P_j x$  as saying that  $x$  has property  $P_j$ ; and  $R_k xy$  as saying that  $x$  bears relation  $R_k$  to  $y$ . A guiding principle in building  $T_M$  is that *the absence of a claim is a claim of absence*: for example, if a box  $C_1$  does not have a circle labeled  $P_1$  (where  $P_1$  does occur somewhere in the script), then we interpret the script as claiming that the members of the class  $C_1$  do not possess the property  $P_1$ . We now build the axioms of the theory  $T_M$ .

We have an axiom of exhaustivity, saying that no objects exist outside of the classes depicted in the model. It is enough to say that no objects exist outside the basic classes. So, where  $C_{i_1}, \dots, C_{i_j}$  are all of the basic classes, the exhaustivity axiom is:

$$\vdash_{T_M} C_{i_1} x \vee \dots \vee C_{i_j} x$$

Next we add axioms of non-triviality, saying that the classes depicted are non-empty. Again, it is enough to say that the basic classes are non-empty. For each basic class  $C_i$ , we add:

$$\vdash_{T_M} \exists x C_i x$$

We also need axioms to say which of the basic classes are disjoint. For each pair of basic classes  $C_i$  and  $C_j$  with  $i \neq j$ , we add either a class equivalence or a class exclusion axiom. If  $C_i = C_j$ , then we add a class equivalence axiom:

$$\vdash_{T_M} C_i x \leftrightarrow C_j x$$

Otherwise, we add a class exclusion axiom:

$$\vdash_{T_M} \neg(C_i x \wedge C_j x)$$

Likewise, we need relation exclusion axioms, to capture the conventional constraint on relations. For each pair of distinct relation symbols  $R_i$  and  $R_j$ , we add both of the following:

$$\vdash_{T_M} \neg(R_i xy \wedge R_j xy)$$

$$\vdash_{T_M} \neg(R_i xy \wedge R_j yx)$$

Similarly, according to whether  $R_k$  is symmetric or asymmetric, we add either

$$\vdash_{T_M} R_k xy \rightarrow R_k yx$$

or

$$\vdash_{T_M} R_k xy \rightarrow \neg R_k yx$$

Now, we characterize non-basic classes by listing the subclasses of which they are composed. If  $C_i$  is non-basic, and its immediate subclasses are  $C_{j_1}, \dots, C_{j_k}$ , then we add the following composition axiom:

$$\vdash_{T_M} C_i x \leftrightarrow C_{j_1} x \vee \dots \vee C_{j_k} x$$

Thus, a non-basic class is characterized by the basic subclasses of which it is ultimately composed.

Finally, we add characterization axioms, giving the properties attributed to members of each basic class.

For each basic class  $C_i$ , the characterization axiom is:

$$\vdash_{T_M} C_i x \rightarrow \Phi_i x \wedge \neg \Psi_i x,$$

where  $\Phi_i x$  and  $\Psi_i x$  are to be defined as follows.

To define the formulas  $\Phi_i x$  and  $\Psi_i x$  that do the real work of characterizing a basic class  $C_i$ , we must look at the relations and properties attributed by the model to members of  $C_i$ .  $\Phi_i x$  will be a conjunction listing the properties that members of  $C_i$  must have, and  $\Psi_i x$  will be a disjunction listing the properties that members of  $C_i$  lack. We build  $\Phi_i x$  and  $\Psi_i x$  by going through all the nonlogical symbols of  $\mathcal{L}$  other than class symbols and checking whether and how they apply to the class  $C_i$  in the model.

For each predicate symbol  $P_k$ , if the model-description contains a sentence “ $C_j P_k$ ,” where  $C_j$  is any superclass of  $C_i$ , then add  $P_k x$  as a conjunct of  $\Phi_i x$ ; otherwise, add the same formula as a disjunct of  $\Psi_i x$ .

For each relation symbol  $R_k$ , we have several cases to check. If the model-description contains a sentence “ $C_j R_k$ ,” where  $C_j$  is any superclass of  $C_i$ , then add  $R_k x x$  as a conjunct of  $\Phi_i x$ ; otherwise, add the same formula as a disjunct of  $\Psi_i x$ .

If the model-description contains a sentence “ $C_j \rightarrow_{\forall} R_k C_g$ ,” where  $C_j$  is any superclass of  $C_i$ , then add  $\forall y(C_j y \rightarrow R_k x y)$  as a conjunct of  $\Phi_i x$ ; otherwise, add the same formula as a disjunct of  $\Psi_i x$ . If the model-description contains a sentence “ $C_g \rightarrow_{\forall} R_k C_j$ ,” where  $C_j$  is any superclass of  $C_i$ , then add  $\forall y(C_g y \rightarrow R_k y x)$  as a conjunct of  $\Phi_i x$ ; otherwise, add the same formula as a disjunct of  $\Psi_i x$ .

If the model-description contains a sentence “ $C_j \rightarrow_{\exists} R_k C_g$ ,” where  $C_j$  is any superclass of  $C_i$ , and it does not contain any sentence “ $C_j \rightarrow_{\forall} R_k C_h$ ,” where  $C_h$  is a superclass of  $C_g$ , then add  $\exists y(C_j y \wedge R_k x y)$  and  $\exists y(C_j y \wedge \neg R_k x y)$  as conjuncts of  $\Phi_i x$ ; otherwise, add the first formula as a disjunct of  $\Psi_i x$ .

If the model-description contains a sentence “ $C_g \rightarrow_{\exists} R_k C_j$ ,” where  $C_j$  is any superclass of  $C_i$ , and it does not contain any sentence “ $C_h \rightarrow_{\forall} R_k C_j$ ,” where  $C_h$  is a superclass of  $C_g$ , then add  $\exists y(C_g y \wedge R_k y x)$  and  $\exists y(C_g y \wedge \neg R_k y x)$  as conjuncts of  $\Phi_i x$ ; otherwise, add the first formula as a disjunct of  $\Psi_i x$ .

This completes the definition of  $\Phi_i x$  and  $\Psi_i x$ , and thereby also completes the definition of  $T_M$ .

### Always-preciseness

To prove the following result, we extend  $T_M$  to a new theory,  $T'_M$ , as follows. Take an arbitrary basic class—say,  $C_1$ . We get  $T'_M$  by adding a constant  $c$  to the language of  $T_M$ , and the axiom  $\vdash_{T'_M} C_1 c$ , which we call the axiom for  $c$ . We will deal with  $T'_M$  in what follows rather than with  $T_M$ . This is a legitimate move because,

for any sentence  $\phi$  in the language of  $T_M$  (i.e., any sentence in  $T'_M$  not involving the new constant  $c$ ),  $\vdash_{T_M} \phi$  iff  $\vdash_{T'_M} \phi$ . In other words,  $T'_M$  is a *conservative extension* of  $T_M$ .

LEMMA 1.  $T'_M$  is a conservative extension of  $T_M$ .

*Proof.* By the non-triviality axiom for  $C_1$ , we have  $\vdash_{T_M} \exists x C_1 x$ . The lemma therefore follows by a theorem on functional extensions (Shoenfield 1967, pp. 55–56).  $\square$

**THEOREM 1 (Always-Preciseness).** *Any consistent conceptual modeling script in ERM-R is precise: for any script  $M$ , the theory  $T_M$  is complete in  $FO^2$ .*

*Proof.* By Shoenfield (1967, p. 83, Lemmas 2 and 3), it suffices to show that every variable-free formula of  $T'_M$  is decidable in  $T'_M$  and that every simply existential formula (formula of the form  $\exists x A$ , with  $A$  open) is equivalent in  $T'_M$  to an open formula.  $FO^2$  can be axiomatized to recover classical consequence (Henkin 1967)—i.e., if  $\Gamma$  is a set of formulas of  $FO^2$  and  $\phi$  is a formula of  $FO^2$ , and  $\phi$  is derivable from  $\Gamma$  in FOL, then  $\phi$  is derivable from  $\Gamma$  in  $FO^2$ . Therefore, in showing that each simply existential formula of  $FO^2$  is equivalent in  $T'_M$  to an open formula of  $FO^2$ , we will not worry about intermediate formulas in FOL but not in  $FO^2$  (e.g., through changes of bound variables).

The only variable-free formulas in  $\mathcal{L}'$ , the language of  $T'_M$ , are boolean combinations of formulas of the form  $P_k c$ ,  $C_k c$ , and  $R_k c c$ . Therefore, it is enough to show that each such atomic formula is decidable in  $T'_M$ . First, each  $C_k c$  is true if  $C_k$  is a superclass of  $C_1$  by the axiom for  $c$  and the composition and class equivalence axioms. If  $C_k$  is not a superclass of  $C_1$ , then  $C_k c$  is false by the composition and class exclusion axioms. Once we have the truth values of  $C_k c$ , we can determine whether  $P_k c$  is true by the characterization and composition axioms.

Finally, take  $R_k c c$ . We have either  $\vdash_{T'_M} \phi$  or  $\vdash_{T'_M} \neg \phi$  according to whether the model-description contains a sentence “ $C_j R_k$ ,” where  $C_j$  is any superclass of  $C_1$ , by the axiom for  $c$ , the composition axioms, and the characterization axioms.

Now we show that every simply existential formula  $\exists x A$  is equivalent in  $T'_M$  to an open formula. First, we assume that  $A$  is in disjunctive normal form (i.e.,  $A$  is a disjunction of conjunctions of literals). Because the existential quantifier distributes over disjunction, we can assume without loss of generality that  $A$  is a conjunction of literals. We can further assume that every conjunct of  $A$  contains an occurrence of  $x$ , because  $\exists x (B \wedge C)$  is equivalent to  $\exists x B \wedge C$  if  $x$  does not occur in  $C$ . Now, we will show that  $\exists x A$  is equivalent in

$T'_M$  to a boolean combination of formulas in the set  $\chi = \{C_i y | 1 \leq i \leq l\}$ . (Once we know what classes  $y$  can belong to, we know everything there is to know about what other properties it can have.)

$A$  is equivalent to a conjunction of the formulas  $A_x$  and  $A_y$ , where,  $A_x$  is the conjunction of those literals in  $A$  in which no variable other than  $x$  occurs, and  $A_y$  is the conjunction of those literals in  $A$  in which  $x$  and  $y$  both occur. We will build a boolean combination of formulas in  $\chi$  by using  $A_x$  to restrict our attention to a subset of the original conceptual model, and then using that subset plus  $A_y$  to state a constraint on  $y$ .

To begin, focus on  $A_x$ . We will use this to determine the classes to which  $x$  might belong. We do this by showing that  $A_x$  (i.e., any conjunction of literals in each of which  $x$  occurs, but no other variable occurs) is equivalent to a disjunction  $C_{i_1} x \vee \dots \vee C_{i_j} x$ . We proceed by induction on the number of literals in  $A_x$ .

First, suppose  $A_x$  is a literal. Then there are five possibilities:  $A_x$  is  $C_k x$ ,  $P_k x$ ,  $R_k x x$ ,  $R_k x c$ ,  $R_k c x$ , or the negation of one of these formulas. The first case is trivial. In the remaining cases, the exhaustivity, characterization, composition, class exclusion, and class equivalence axioms, plus the axiom for  $c$ , give us our result.

Now, for induction, assume that the claim holds for any formula of length  $k$  or less ( $k \geq 1$ ), and that  $A_x$  contains  $k + 1$  literals. Then  $A_x$  is equivalent to  $B \wedge D$ , where  $B$  is a literal, and  $D$  is of length  $k$ . Then  $D$  is equivalent to a disjunction  $C_{i_1} x \vee \dots \vee C_{i_j} x$  by the induction hypothesis, and  $B$  to a disjunction  $C_{g_1} \vee \dots \vee C_{g_h}$ . So  $A_x$  is equivalent to  $(C_{g_1} \vee \dots \vee C_{g_h}) \wedge (C_{i_1} x \vee \dots \vee C_{i_j} x)$ , which is equivalent to  $(C_{g_1} \wedge C_{i_1} x) \vee \dots \vee (C_{g_h} \wedge C_{i_1} x) \vee \dots \vee (C_{g_h} \wedge C_{i_j} x)$ . But any formula of the form  $C_g x \wedge C_i x$  will be equivalent either to  $\perp$  by the composition and class exclusion axioms, or to  $C_g x$  by the composition and class equivalence axioms.

So we can conclude that  $\exists x A$  is equivalent in  $T'_M$  to  $\exists x ((C_{g_1} x \vee \dots \vee C_{g_h} x) \wedge A_y)$ . This in turn is equivalent to  $\exists x (C_{g_1} x \wedge A_y) \vee \dots \vee \exists x (C_{g_h} x \wedge A_y)$ , so it is enough to show that  $\exists x A$  is equivalent to a boolean combination of formulas in  $\chi$  when  $A_x$  is an atomic formula of the form  $C_i x$ .

Now consider  $A_y$ . This is a conjunction of literals, each of which contains an occurrence of  $x$  and an occurrence of  $y$ . Therefore, each literal must be either  $R_k x y$ ,  $R_k y x$ , or their negations. Note, first, that by the relation exclusion axioms,  $R_k x y$  entails  $\neg R_g x y$  and  $\neg R_g y x$  for  $g \neq k$ ; furthermore, either  $R_k x y$  entails  $R_k y x$  or it entails  $\neg R_k y x$ . Therefore, we may assume that  $A_y$  is either a single unnegated atomic formula  $R_k x y$  or  $R_k y x$ , or it is a conjunction of negated atomic formulas. In the latter case, we can regard  $A_y$  as a

conjunction  $B_y \wedge D_y$ , where  $B_y$  is a conjunction of formulas of the form  $\neg R_k xy$ , and  $D_y$  is a conjunction of formulas of the form  $\neg R_k yx$ .

By the characterization axiom for  $C_i$  (or by the composition axiom, and the characterization axioms for the component subclasses of  $C_i$ ), we can show that  $\exists xA$  is equivalent to  $(C_{i_1}y \vee \dots \vee C_{i_k}y)$ , where the various  $C_{i_g}$  are specified as follows. We can use  $A_y$  to produce a list of classes to which  $y$  might belong. If  $A_y$  is of the form  $R_k xy$ , then the list will consist of those classes  $C_j$  such that the model-description contains “ $C_a \rightarrow_{\exists} R_k C_b$ ” or “ $C_a \rightarrow_{\forall} R_k C_b$ ,” where  $C_a$  is a superclass of  $C_i$  (the class to which  $x$  belongs) and  $C_b$  is a superclass of  $C_j$ . In this case,  $\Phi_i x$  and  $\Psi_i x$  (or  $\Phi_j x$  and  $\Psi_j x$  for the basic subclasses of  $C_i$ ) were constructed to entail that  $\exists y(C_j y \wedge R_g xy)$ ; and  $\Phi_j x$  and  $\Psi_j x$  for all other classes  $C_j$  were constructed to entail the negation of this formula. The list is similar if  $A_y$  is of the form  $R_k yx$ . Suppose instead that  $A_y$  is of the form  $B_y \wedge D_y$ , as described at the end of the previous paragraph. Then we produce a list for  $B_y$  and a list for  $D_y$ , and take the intersection of the two lists. The list for  $B_y$  will consist of those classes  $C_j$  such that the model-description contains no sentence “ $C_a \rightarrow_{\forall} R_{k_g} C_b$ ,” where  $C_a$  is a superclass of  $C_i$  and  $C_b$  is a superclass of  $C_j$ , for  $1 \leq g \leq h$ . In this case,  $\Phi_i x$  and  $\Psi_i x$  (or  $\Phi_j x$  and  $\Psi_j x$  for the basic subclasses of  $C_i$ ) were constructed to entail that  $\exists y(C_j y \wedge \neg R_g xy)$ ; and  $\Phi_j x$  and  $\Psi_j x$  for all other classes  $C_j$  were constructed to entail the negation of this formula. The list for  $D_y$  is built similarly to the list for  $B_y$ . If either of these lists is empty, or if they do not overlap, then  $\exists xA$  is equivalent in  $T'_M$  to  $\perp$ .  $\square$

The following fact is not difficult to verify. Say a script  $M$  is inconsistent iff  $T_M$  is inconsistent. For convenience, write  $Cl(A)$  for the  $\subseteq$ -closure of a class  $A$  (in a given script  $M$ ):  $Cl(A)$  is the smallest set of classes including  $A$  and every class in  $M$  which can be reached by a finite number of  $\subseteq$ -steps from  $A$ . For example, if  $M$  includes the sentences “ $A \subseteq B$ ” and “ $B \subseteq C$ ,” then  $B$  and  $C$  are both members of  $Cl(A)$ .

PROPOSITION 1. *A script  $M$  is inconsistent iff at least one of the following conditions holds:*

1. *For some classes  $A$  and  $B$ , there are classes  $C \in Cl(A)$  and  $D \in Cl(B)$  such that  $M$  contains both “ $A \rightarrow_{\exists} R_k B$ ” and “ $C \rightarrow_{\forall} R_k D$ ” for some  $k$ .*
2. *For some classes  $A$  and  $B$ , there are classes  $C_1, C_2 \in Cl(A)$  and  $D_1, D_2 \in Cl(B)$  such that  $M$  contains both “ $C_1 \rightarrow_{\forall} R_i D_1$ ” and “ $C_2 \rightarrow_{\forall} R_j D_2$ ” for some  $i \neq j$ .*

Condition 1 entails that  $M$  is inconsistent because our semantics for “ $A \rightarrow_{\exists} R_k B$ ” entails that each member of  $A$  bears  $R_k$  to some *but not all* members of  $B$ . Condition 2 entails that  $M$  is inconsistent because of our requirement that the relations  $R_k$  be mutually exclusive.

## References

- Evermann J, Wand Y (2005) Ontology based object-oriented domain modelling: Fundamental constructs. *Requirements Engineering* 10:146–60.
- Henkin L (1967) *Logical Systems Containing a Finite Number of Symbols*, volume 21 of *Séminaire de Mathématiques Supérieures* (Montreal: Presses de l'Université de Montréal).
- Shoenfield JR (1967) *Mathematical Logic* (Reading, MA: Addison-Wesley), reprinted 2000 by Association for Symbolic Logic/A.K. Peters, Natick, MA.
- Wand Y, Weber R (1993) On the ontological expressiveness of information systems analysis and design grammars. *Journal of Information Systems* 3:217–237.
